# Supplementary material for: International meta-analysis of PTSD genome-wide association studies identifies sex- and ancestry-specific genetic risk loci
Source: PubMed Central journal article supplement (PMC6783435; doi:10.1038/s41467-019-12576-w), 2019-10-08
Supplement: 41467_2019_12576_MOESM6_ESM.pdf [file 41467_2019_12576_MOESM6_ESM.pdf]

**Title:** Supplementary Data 1

**Description:** Demographics of PGC-PTSD Freeze 2 cohorts

**Title:** Supplementary Data 2

**Description:** Significant pathways and associated genes identified in MAGMA gene-set analyses

**Title:** Supplementary Data 3

**Description:** Genetic correlations of PTSD with several traits and disorders for data publicly available on LD Hub
